# Supplementary material
Source: PubMed Central journal article supplement (PMC1630412)
Supplement: 7601383s2.pdf [file 7601383s2.pdf]

**A**

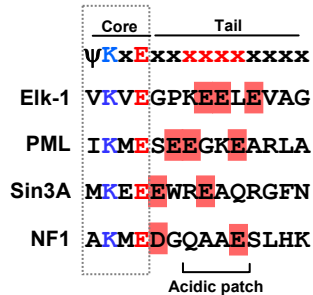

**B**

| GO term                                    | GOTerm ID  | Fold change | P value  |
|--------------------------------------------|------------|-------------|----------|
| <b>Cellular Component</b>                  |            |             |          |
| nucleus                                    | GO:0005634 | 1.23        | 6.09E-13 |
| intracellular                              | GO:0005622 | 1.11        | 4.91E-09 |
| organelle                                  | GO:0043226 | 1.12        | 1.02E-08 |
| membrane-enclosed organelle                | GO:0043227 | 1.12        | 1.84E-06 |
| <b>Molecular Function</b>                  |            |             |          |
| DNA binding                                | GO:0003677 | 1.36        | 1.30E-13 |
| transcription regulator activity           | GO:0030528 | 1.39        | 6.39E-10 |
| transcription factor activity              | GO:0003700 | 1.43        | 2.78E-08 |
| zinc ion binding                           | GO:0008270 | 1.23        | 4.18E-06 |
| <b>Biological Process</b>                  |            |             |          |
| regulation of metabolism                   | GO:0019222 | 1.35        | 2.27E-15 |
| regulation of transcription, DNA dependent | GO:0006355 | 1.38        | 2.85E-15 |
| transcription, DNA-dependent               | GO:0006351 | 1.37        | 8.79E-15 |
| regulation of transcription                | GO:0045449 | 1.36        | 2.21E-06 |

**C**

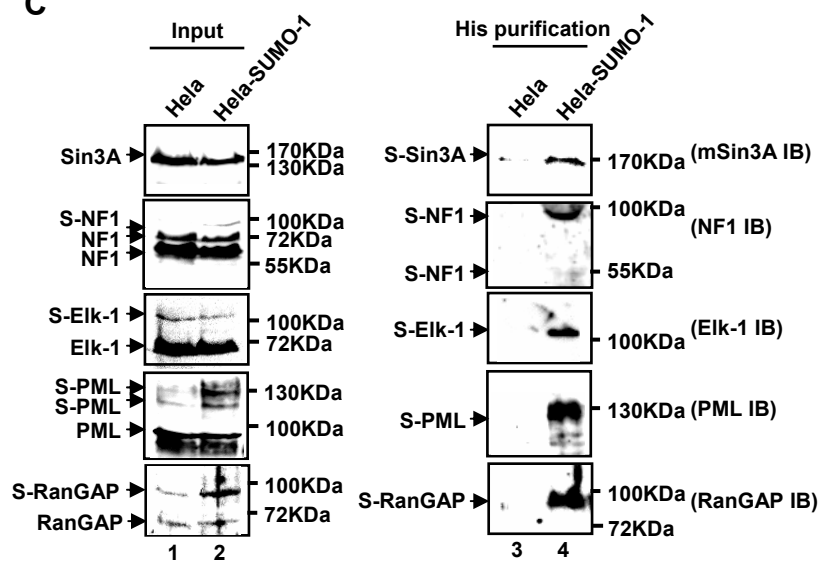

Fig. 8
